# Supplementary material for: Substituted group directed assembly of zinc coordination compounds based on bifunctional ligands, from mono, di to tristetrazole–carboxylate
Source: Royal Society of Chemistry journal article supplement (doi:10.1039/c5ra03848k), 2015-01-01
Supplement: c5ra03848k5.pdf [file c5ra03848k5.pdf]

Table S2. Hydrogen-bonding Geometry (Å and °) for **1-4**

| D—H···A                                                                                               | D—H  | H···A | D···A     | D—H···A |
|-------------------------------------------------------------------------------------------------------|------|-------|-----------|---------|
| <b>[Zn(atza)<sub>2</sub>(H<sub>2</sub>O)<sub>4</sub>] (1)</b>                                         |      |       |           |         |
| O(3)—H(3A)···N(3)#1                                                                                   | 0.96 | 2.31  | 3.146(4)  | 145     |
| O(3)—H(3B)···O(2)                                                                                     | 0.96 | 2.19  | 2.706(4)  | 113     |
| O(4)—H(4A)···N(1)#2                                                                                   | 0.96 | 2.27  | 2.921(4)  | 124     |
| O(4)—H(4B)···N(2)#3                                                                                   | 0.96 | 2.51  | 3.470(4)  | 173     |
| O(4)—H(4A)···N(3)#3                                                                                   | 0.96 | 2.45  | 3.345(4)  | 155     |
| O(5)—H(5A)···O(2)#4                                                                                   | 0.86 | 2.03  | 2.858(4)  | 161     |
| O(5)—H(5B)···N(2)#5                                                                                   | 0.86 | 2.23  | 3.076(4)  | 166     |
| <b>[Zn(pytza)<sub>2</sub>](2)</b>                                                                     |      |       |           |         |
| C(6)—H(6)···O(1)#1                                                                                    | 0.93 | 2.48  | 3.102     | 124     |
| C(7)—H(7)···O(2)#2                                                                                    | 0.93 | 2.40  | 2.009     | 123     |
| <b>[Zn(datza)(H<sub>2</sub>O)<sub>2</sub>]·3H<sub>2</sub>O (3)</b>                                    |      |       |           |         |
| O(3)—H(3C)···O(5)#1                                                                                   | 0.85 | 1.96  | 2.776(6)  | 161     |
| O(3)—H(3D)···O(9)#2                                                                                   | 0.85 | 1.99  | 2.836(5)  | 170     |
| O(4)—H(4A)···O(1)                                                                                     | 0.85 | 2.33  | 2.769(7)  | 113     |
| O(4)—H(4A)···O(1)#3                                                                                   | 0.85 | 2.47  | 3.111(7)  | 133     |
| O(4)—H(4B)···O(6)#1                                                                                   | 0.85 | 2.05  | 2.782(7)  | 144     |
| O(7)—H(7A)···O(6)#4                                                                                   | 0.85 | 2.04  | 2.813(8)  | 152     |
| O(8)—H(8A)···O(2)                                                                                     | 0.85 | 2.59  | 3.405(5)  | 160     |
| O(9)—H(9A)···N(5)                                                                                     | 0.85 | 2.00  | 2.719(8)  | 143     |
| O(9)—H(9B)···O(1)#5                                                                                   | 0.85 | 1.89  | 2.708(8)  | 163     |
| C(3)—H(3B)···O(6)#6                                                                                   | 0.97 | 2.54  | 3.390(10) | 146     |
| O(5)—H(5B)···N(8)#5                                                                                   | 0.97 | 2.61  | 3.228(12) | 122     |
| <b>[Zn<sub>3</sub>(tzpha)<sub>2</sub>(H<sub>2</sub>O)<sub>12</sub>]·MeOH·EtOH·4H<sub>2</sub>O (4)</b> |      |       |           |         |

|                          |      |      |           |     |
|--------------------------|------|------|-----------|-----|
| O(7)—H(7A) ···O(14)      | 0.85 | 2.53 | 3.255(14) | 144 |
| O(7)—H(7A) ···N(6)# 1    | 0.85 | 2.45 | 2.976(12) | 121 |
| O(9)—H(9A) ···O(15)# 2   | 0.85 | 2.23 | 2.778(19) | 122 |
| O(9)—H(9B) ···O(13)      | 0.85 | 2.54 | 3.147(13) | 129 |
| O(11)—H(11B) ···O(1)     | 0.85 | 1.95 | 2.685(10) | 144 |
| O(10)—H(11C) ···N(5)# 3  | 0.85 | 2.21 | 2.868(11) | 134 |
| O(12)—H(12D) ···N(4)# 4  | 0.85 | 2.18 | 2.892(11) | 141 |
| O(13)—H(13A) ···O(3)# 3  | 0.85 | 2.11 | 2.736(14) | 130 |
| O(14)—H(14E) ···O(3)# 1  | 0.85 | 2.60 | 3.433(16) | 168 |
| C(10)—H(10A) ···O(8)     | 0.97 | 2.55 | 3.334(11) | 138 |
| C(16)—H(16A) ···O(9)# 5  | 0.96 | 2.28 | 2.917(19) | 123 |
| C(16)—H(16B) ···O(12)# 5 | 0.96 | 1.79 | 2.587(17) | 138 |
| C(16)—H(16C) ···O(6)# 6  | 0.96 | 1.63 | 2.37(2)   | 131 |
| C(18)—H(18C) ···O(5)# 7  | 0.95 | 2.04 | 2.04(3)   | 156 |

---

#### Symmetry codes

For **1**: # 1: -1+x, 1+y, z; # 2: -1+x,y,1+z; # 3: 1-x, 2-y, 1-z; # 4: 1-x, 2-y, -z; # 5: -1+x,y,z

For **2**: # 1: 0.5+x, 0.5-y, 0.5+z; # 2: 0.5+x, -0.5+y, z.

For **3**: # 1: -1+x,y,1+z; # 2: -1+x,-1+y,z; # 3: -x,1-y,1-z; # 4: -x,-y,-z; # 5: 1+x,y,z; # 6: 1-x,1-y,-z

For **4**: # 1: 1+x,-1+y,z; # 2: -1+x, y, z; # 3: x, -1+y, z; # 4: -x, 3-y, -z; # 5: 1+x, y, z; # 6: x, -1+y, 1+z; # 7: 1-x, 2-y, -z
