# Supplementary material for: Substituted group directed assembly of zinc coordination compounds based on bifunctional ligands, from mono, di to tristetrazole–carboxylate
Source: Royal Society of Chemistry journal article supplement (doi:10.1039/c5ra03848k), 2015-01-01
Supplement: c5ra03848k6.pdf [file c5ra03848k6.pdf]

Table S1. Selected crystallographic data and structure refinement for **1-4**

| Compound                                        | <b>1</b>                                                        | <b>2</b>                                                         | <b>3</b>                                                       | <b>4</b>                                                                        |
|-------------------------------------------------|-----------------------------------------------------------------|------------------------------------------------------------------|----------------------------------------------------------------|---------------------------------------------------------------------------------|
| Empirical formula                               | C <sub>6</sub> H <sub>12</sub> ZnN <sub>10</sub> O <sub>8</sub> | C <sub>16</sub> H <sub>12</sub> ZnN <sub>10</sub> O <sub>4</sub> | C <sub>6</sub> H <sub>14</sub> ZnN <sub>9</sub> O <sub>9</sub> | C <sub>36</sub> H <sub>70</sub> Zn <sub>3</sub> N <sub>24</sub> O <sub>32</sub> |
| Formula mass                                    | 417.65                                                          | 473.75                                                           | 421.65                                                         | 1547.27                                                                         |
| Crystal system                                  | triclinic                                                       | monoclinic                                                       | triclinic                                                      | triclinic                                                                       |
| Space group                                     | <i>P</i> $\bar{1}$                                              | <i>C</i> 2/ <i>c</i>                                             | <i>P</i> $\bar{1}$                                             | <i>P</i> $\bar{1}$                                                              |
| <i>a</i> (Å)                                    | 6.1124(12)                                                      | 22.524(4)                                                        | 9.1851(18)                                                     | 8.5225(17)                                                                      |
| <i>b</i> (Å)                                    | 6.6178(13)                                                      | 8.6370(17)                                                       | 9.2931(19)                                                     | 13.641(3)                                                                       |
| <i>c</i> (Å)                                    | 9.6089(19)                                                      | 9.758(2)                                                         | 11.060(2)                                                      | 14.685(3)                                                                       |
| $\alpha$ (°)                                    | 78.70(3)                                                        | 90.00                                                            | 107.50(3)                                                      | 65.49(3)                                                                        |
| $\beta$ (°)                                     | 82.88(3)                                                        | 113.25(3)                                                        | 95.43(3)                                                       | 77.19(3)                                                                        |
| $\gamma$ (°)                                    | 75.59(3)                                                        | 90.00                                                            | 118.39(3)                                                      | 79.62(3)                                                                        |
| <i>V</i> (Å <sup>3</sup> )                      | 368.00(13)                                                      | 1744.2(6)                                                        | 759.7(3)                                                       | 1507.2(5)                                                                       |
| <i>Z</i>                                        | 1                                                               | 4                                                                | 2                                                              | 1                                                                               |
| <i>T</i> /K                                     | 291(2)                                                          | 291(2)                                                           | 291(2)                                                         | 293(2)                                                                          |
| <i>D</i> <sub>calcd</sub> (g.cm <sup>-3</sup> ) | 1.885                                                           | 1.804                                                            | 1.843                                                          | 1.705                                                                           |
| $\mu$ (mm <sup>-1</sup> )                       | 1.737                                                           | 1.463                                                            | 1.687                                                          | 1.297                                                                           |
| Reflections collected                           | 3869                                                            | 8640                                                             | 7958                                                           | 11753                                                                           |
| Unique Reflections( <i>R</i> <sub>int</sub> )   | 1677 ( 0.0283)                                                  | 2004 (0.0860)                                                    | 3464 (0.1072)                                                  | 4767 (0.0719)                                                                   |

|                                                    |                |                |                |                |
|----------------------------------------------------|----------------|----------------|----------------|----------------|
| No. Observations ( $I > 2.00$ )                    | 1557           | 1502           | 1920           | 3403           |
| $\sigma(I)$                                        |                |                |                |                |
| No. Variables                                      | 115            | 141            | 211            | 421            |
| $R_1^{[a]}$ , $wR_2^{[b]}$<br>( $I > 2\sigma(I)$ ) | 0.0430, 0.1506 | 0.0610, 0.1059 | 0.0758, 0.1642 | 0.0726, 0.1723 |
| $R_1$ , $wR_2$ (all data)                          | 0.0470, 0.1530 | 0.0910, 0.1157 | 0.1585, 0.2011 | 0.1044, 0.1904 |
| GOF <sup>c</sup>                                   | 1.244          | 1.063          | 0.996          | 0.908          |
| $\Delta/\rho_{\max}$ ( $e/\text{\AA}^3$ )          | 0.923          | 0.406          | 0.611          | 1.313          |
| $\Delta/\rho_{\min}$ ( $e/\text{\AA}^3$ )          | -0.827         | -0.482         | -0.698         | -0.957         |

[a]  $R = \frac{\sum ||F_o| - |F_c||}{\sum |F_o|}$ . [b]  $R_w = \{ \sum w(F_o^2 - F_c^2)^2 / \sum w(F_o^2)^2 \}^{1/2}$ . [c]  $GOF = \{ w((F_o^2 - F_c^2)^2) / (n-p) \}^{1/2}$ , where  $n$  = number of reflections and  $p$  = total numbers of parameters refined.
