# Supplementary figures and images for: Substituted group directed assembly of zinc coordination compounds based on bifunctional ligands, from mono, di to tristetrazole–carboxylate
Source: Royal Society of Chemistry journal article supplement (doi:10.1039/c5ra03848k), 2015-01-01

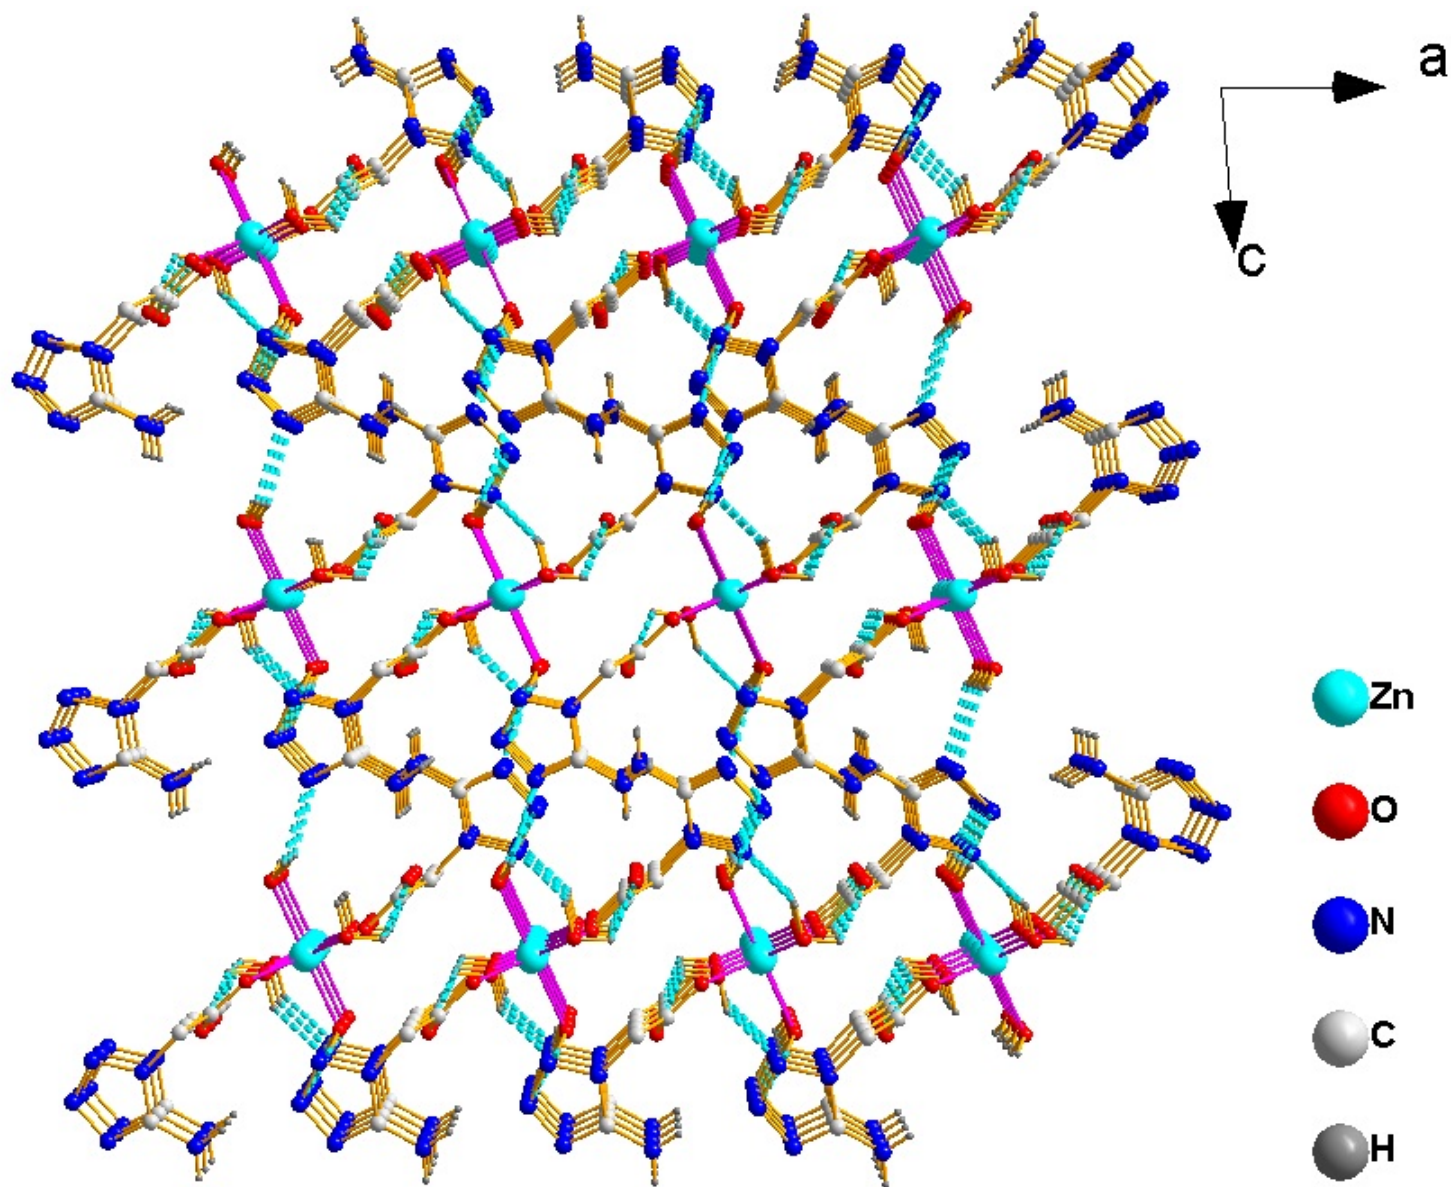

Supplement: c5ra03848k1.pdf [file c5ra03848k1.pdf]

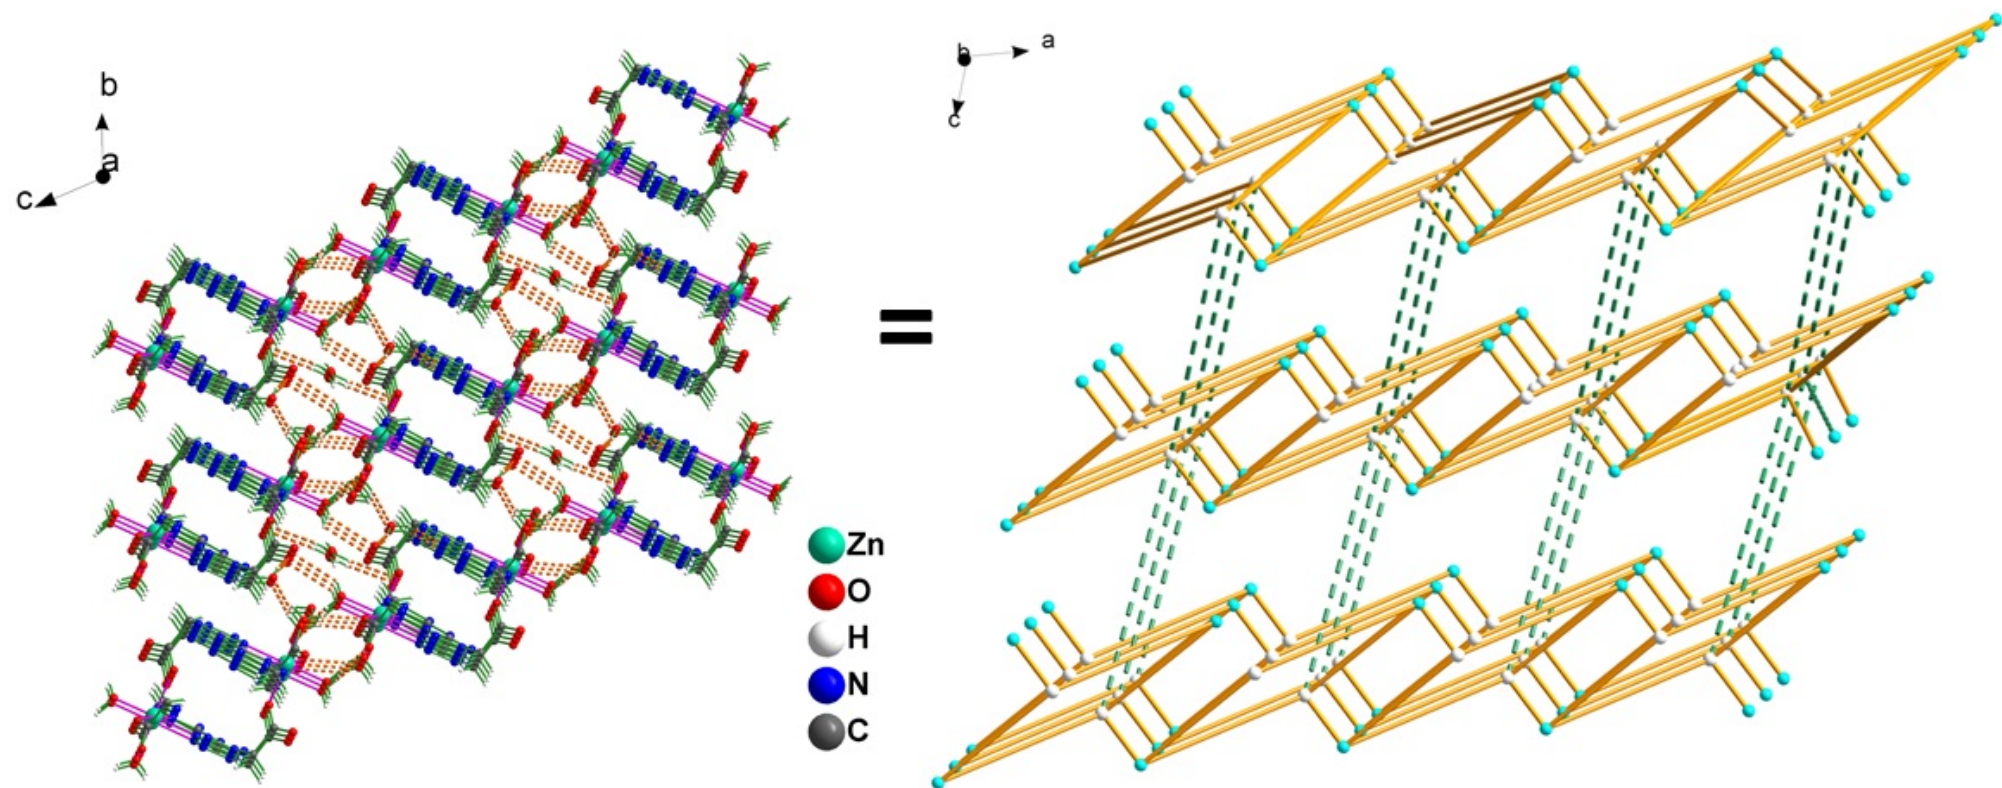

Supplement: c5ra03848k2.pdf [file c5ra03848k2.pdf]

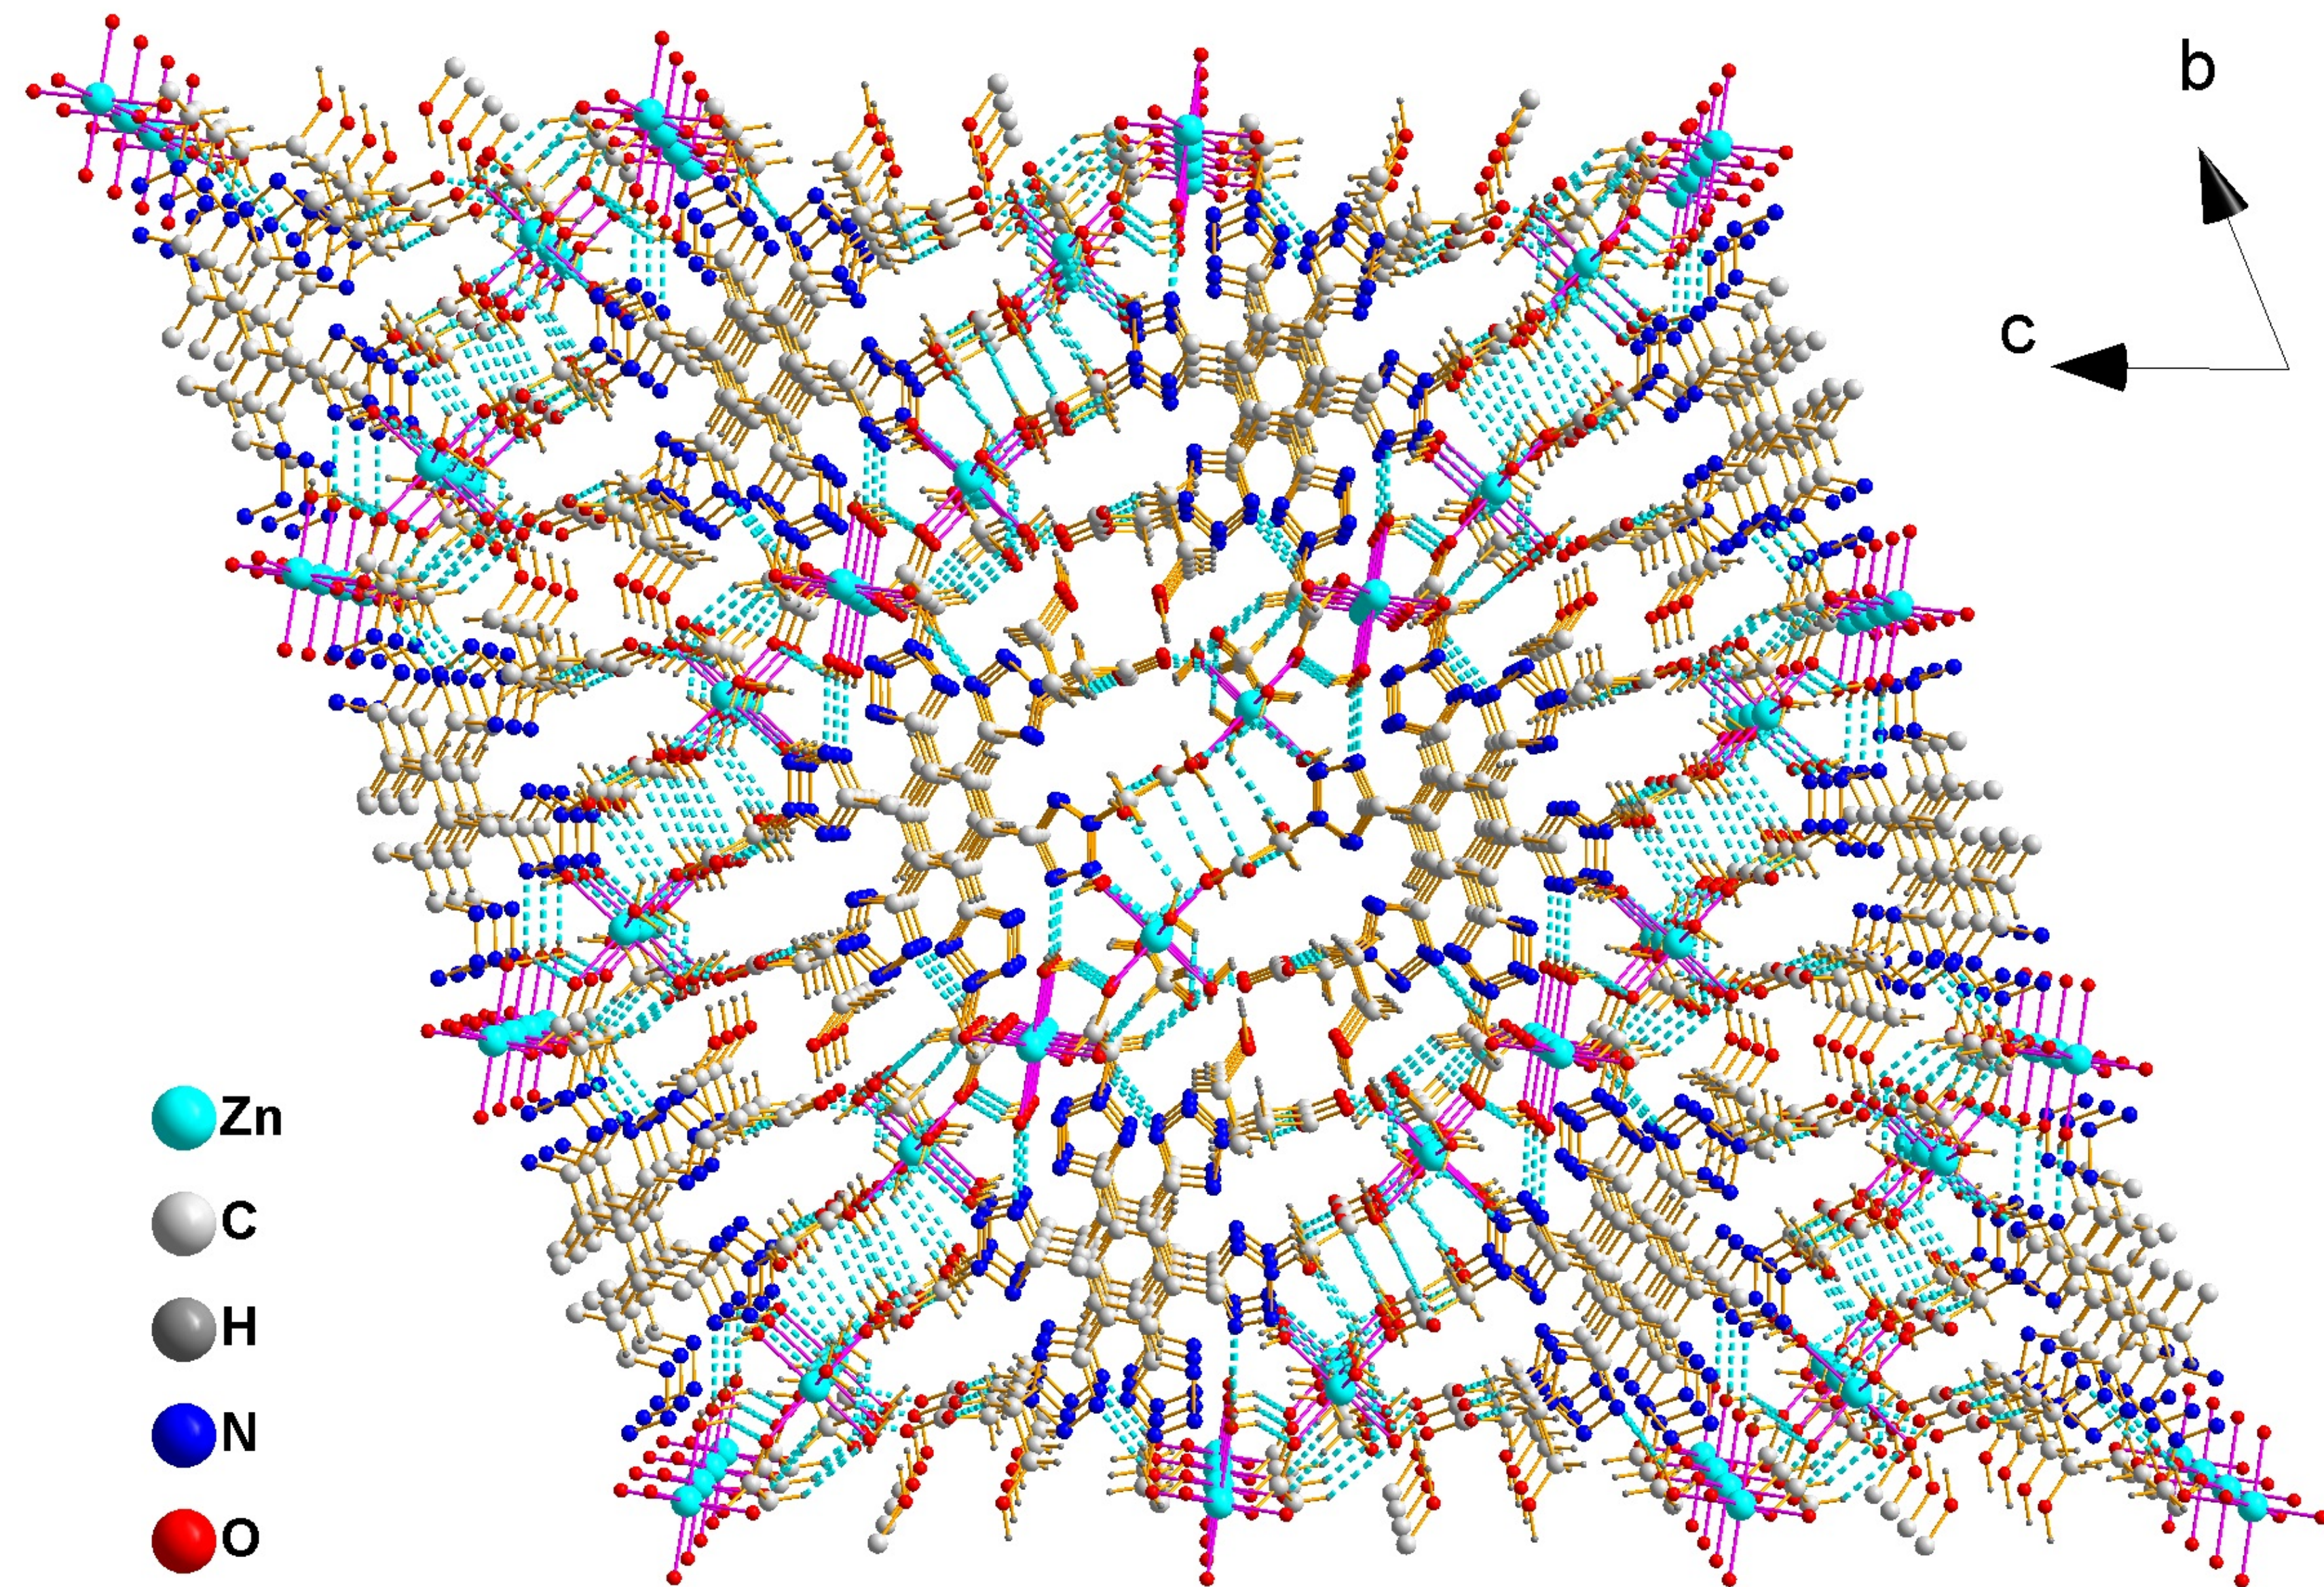

Supplement: c5ra03848k3.pdf [file c5ra03848k3.pdf]

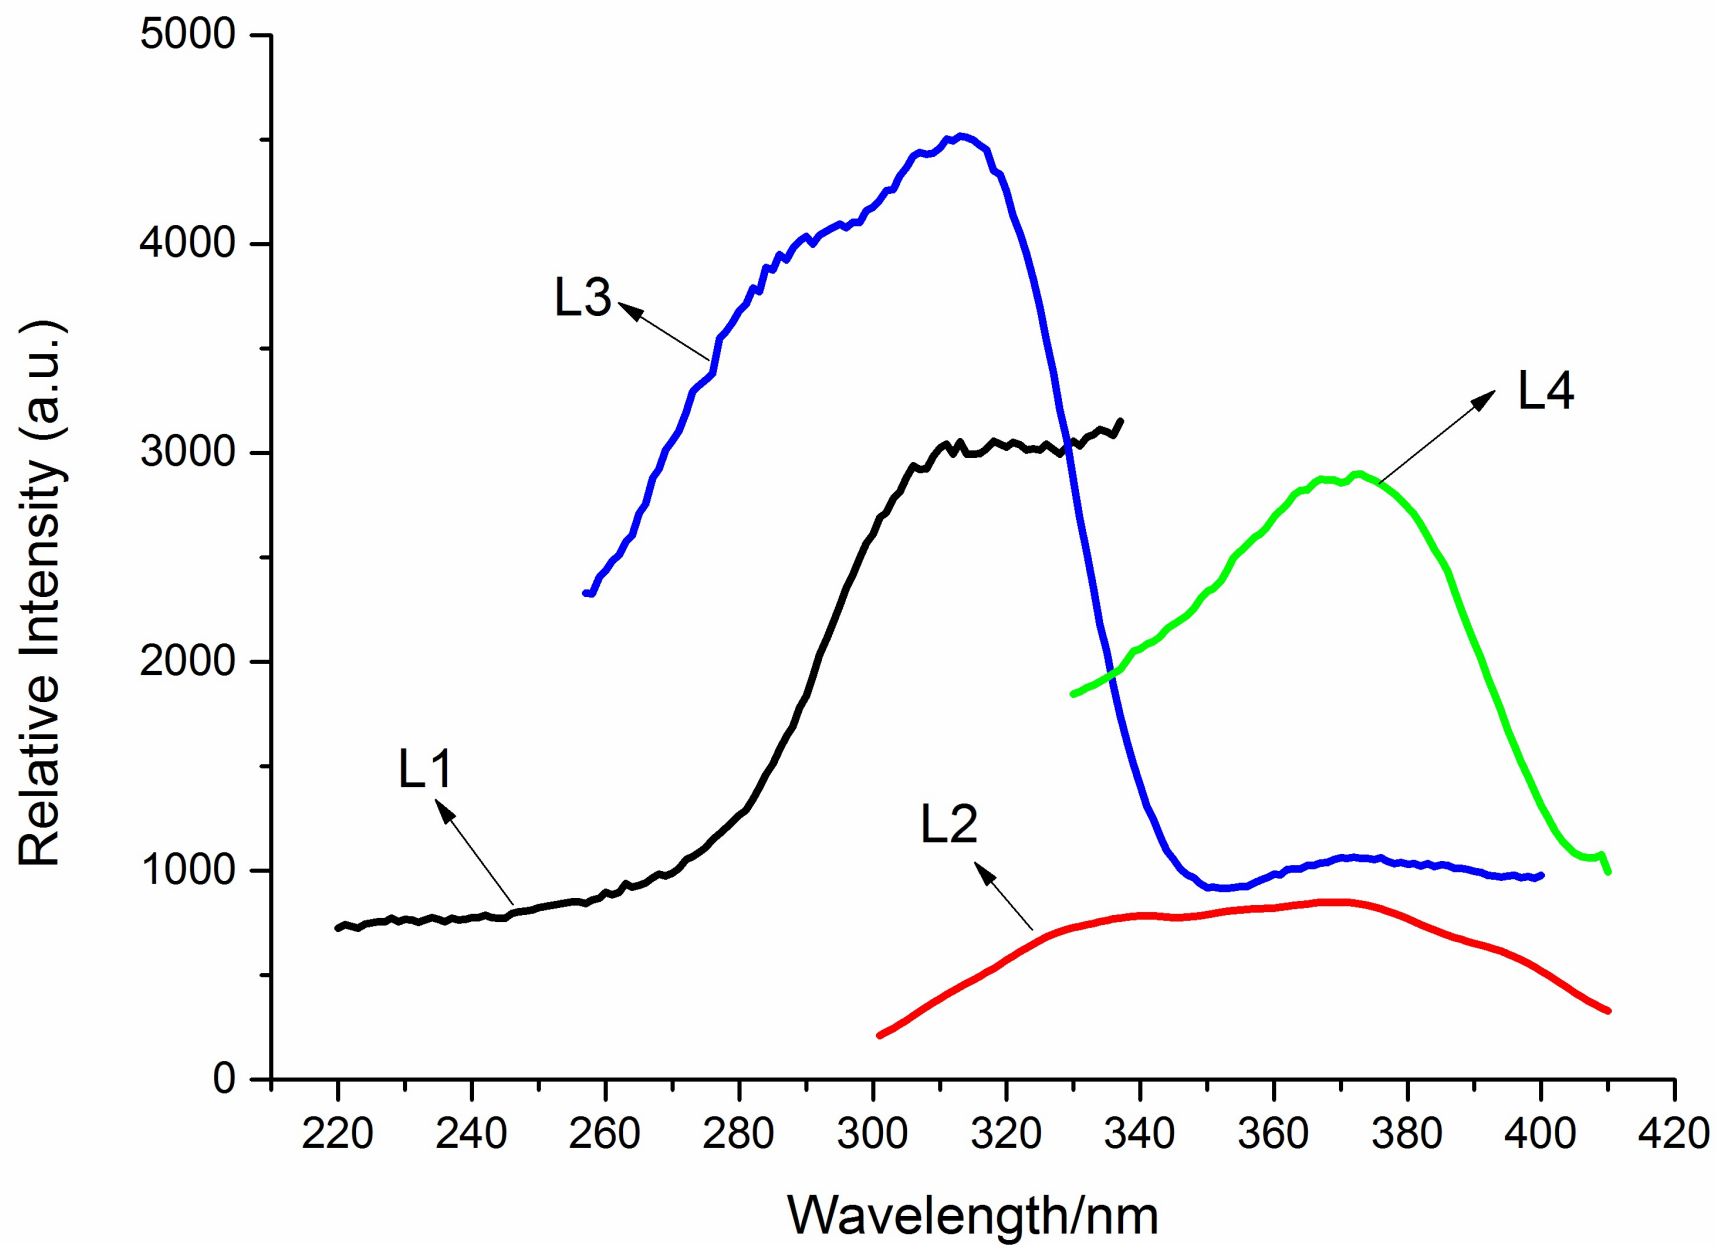

Supplement: c5ra03848k4.pdf [file c5ra03848k4.pdf]
